# Supplementary material for: Nanostructuring SnTe to improve thermoelectric properties through Zn and Sb co-doping
Source: Royal Society of Chemistry journal article supplement (doi:10.1039/d0se01081b), 2020-01-01
Supplement: d0se01081b1.pdf [file d0se01081b1.pdf]

**Electronic Supplementary Information**

**Nanostructuring SnTe to improve thermoelectric  
properties through Zn and Sb co-doping**

Samuel Kimani Kihoi and Ho Seong Lee\*

School of Materials Science and Engineering, Kyungpook National University

80 Daehak-ro, Buk-gu, Daegu, 41566, Republic of Korea

Table S1. Density of samples

| Sample                                                      | Density (g/cm <sup>3</sup> ) |
|-------------------------------------------------------------|------------------------------|
| SnTe                                                        | 6.411                        |
| Sn <sub>0.99</sub> Zn <sub>0.01</sub> Te                    | 6.404                        |
| Sn <sub>0.98</sub> Zn <sub>0.02</sub> Te                    | 6.383                        |
| Sn <sub>0.88</sub> Zn <sub>0.02</sub> Sb <sub>0.1</sub> Te  | 6.327                        |
| Sn <sub>0.83</sub> Zn <sub>0.02</sub> Sb <sub>0.15</sub> Te | 6.329                        |

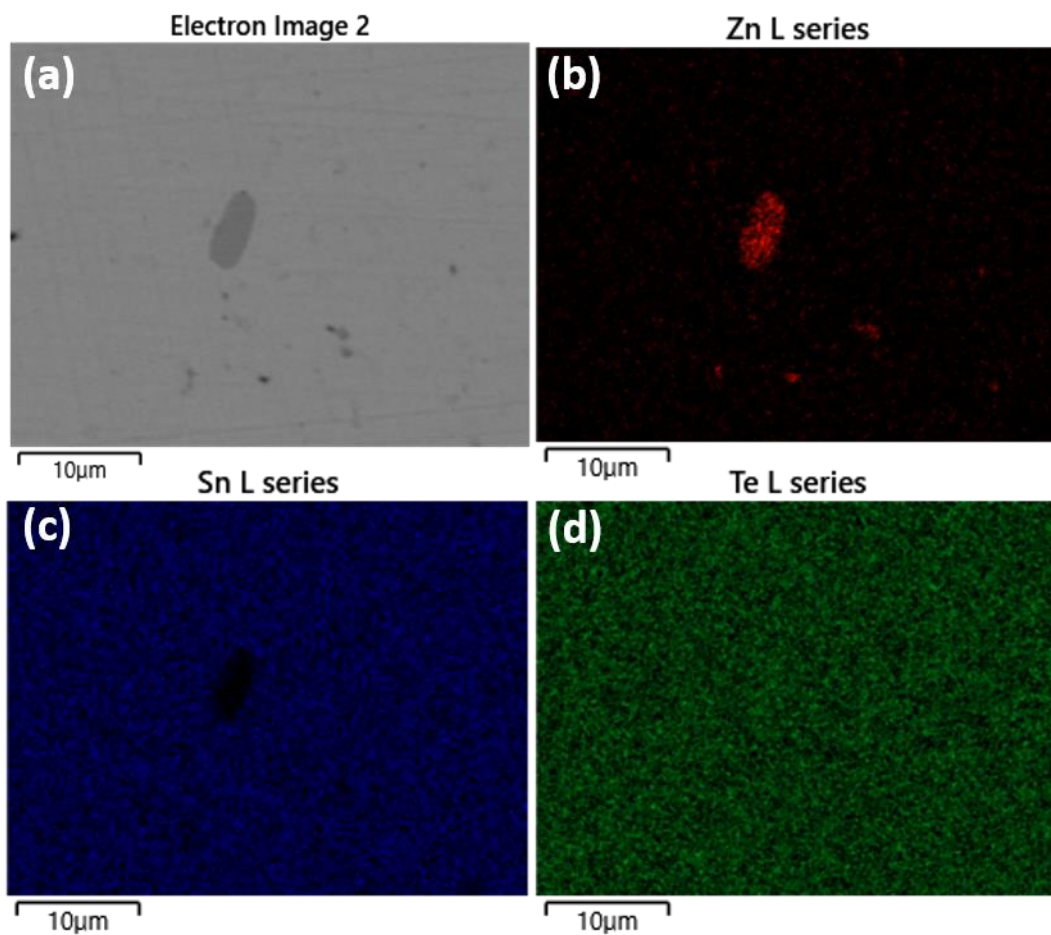

Figure S1. (a) FESEM BSE image and (b-d) corresponding EDS mapping of elements.

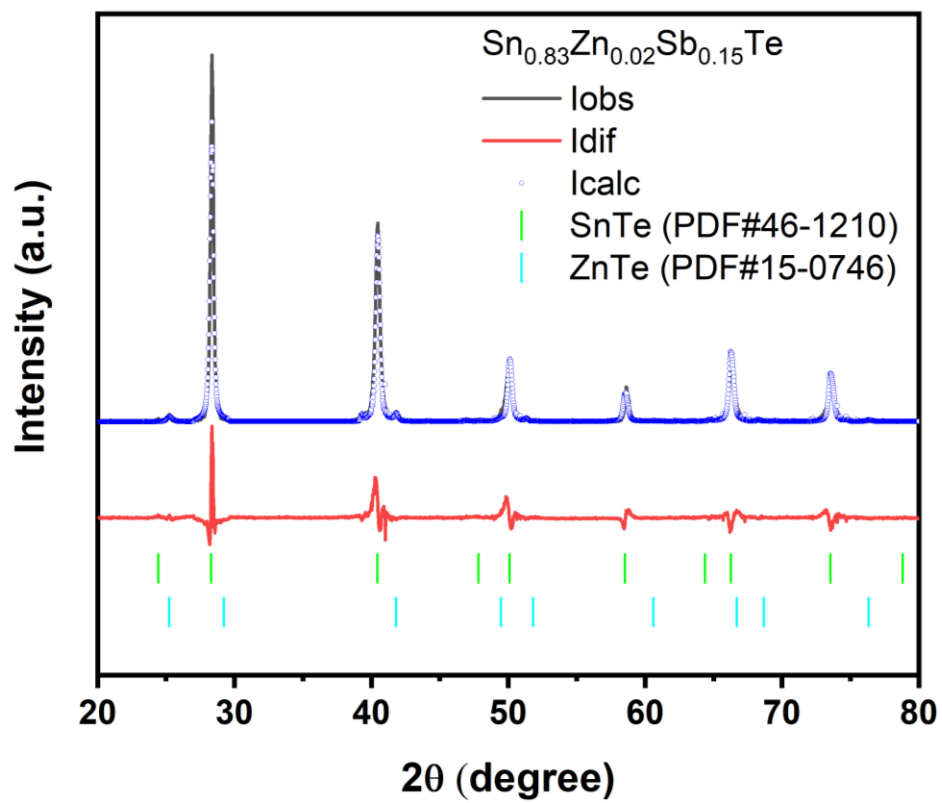

Figure S2. Rietveld refinement for the sample  $\text{Sn}_{0.83}\text{Zn}_{0.02}\text{Sb}_{0.15}\text{Te}$ .

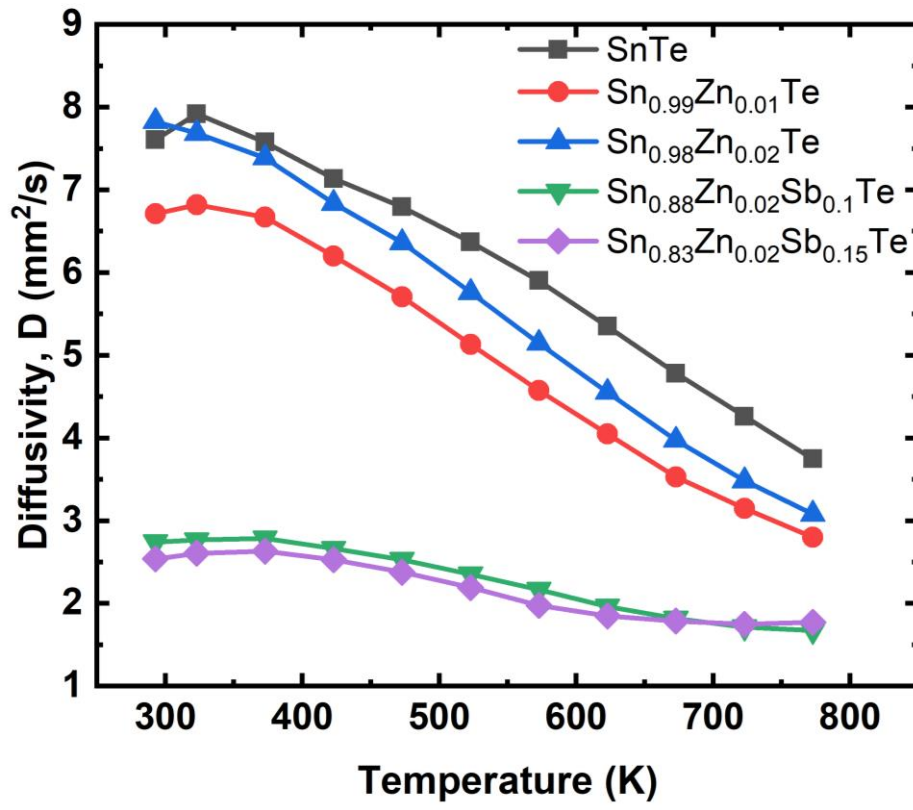

Figure S3. Temperature dependent diffusivity with temperature for the Zn and Sb samples.

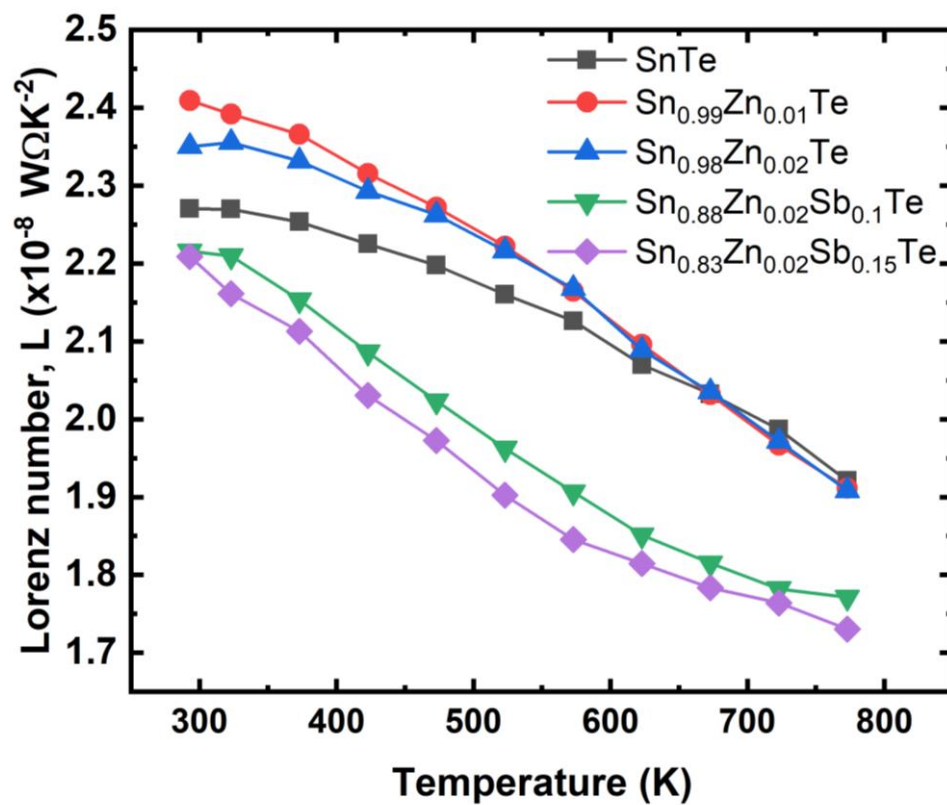

Figure S4. Temperature dependent Lorenz number for the Zn and Sb co-doped samples.

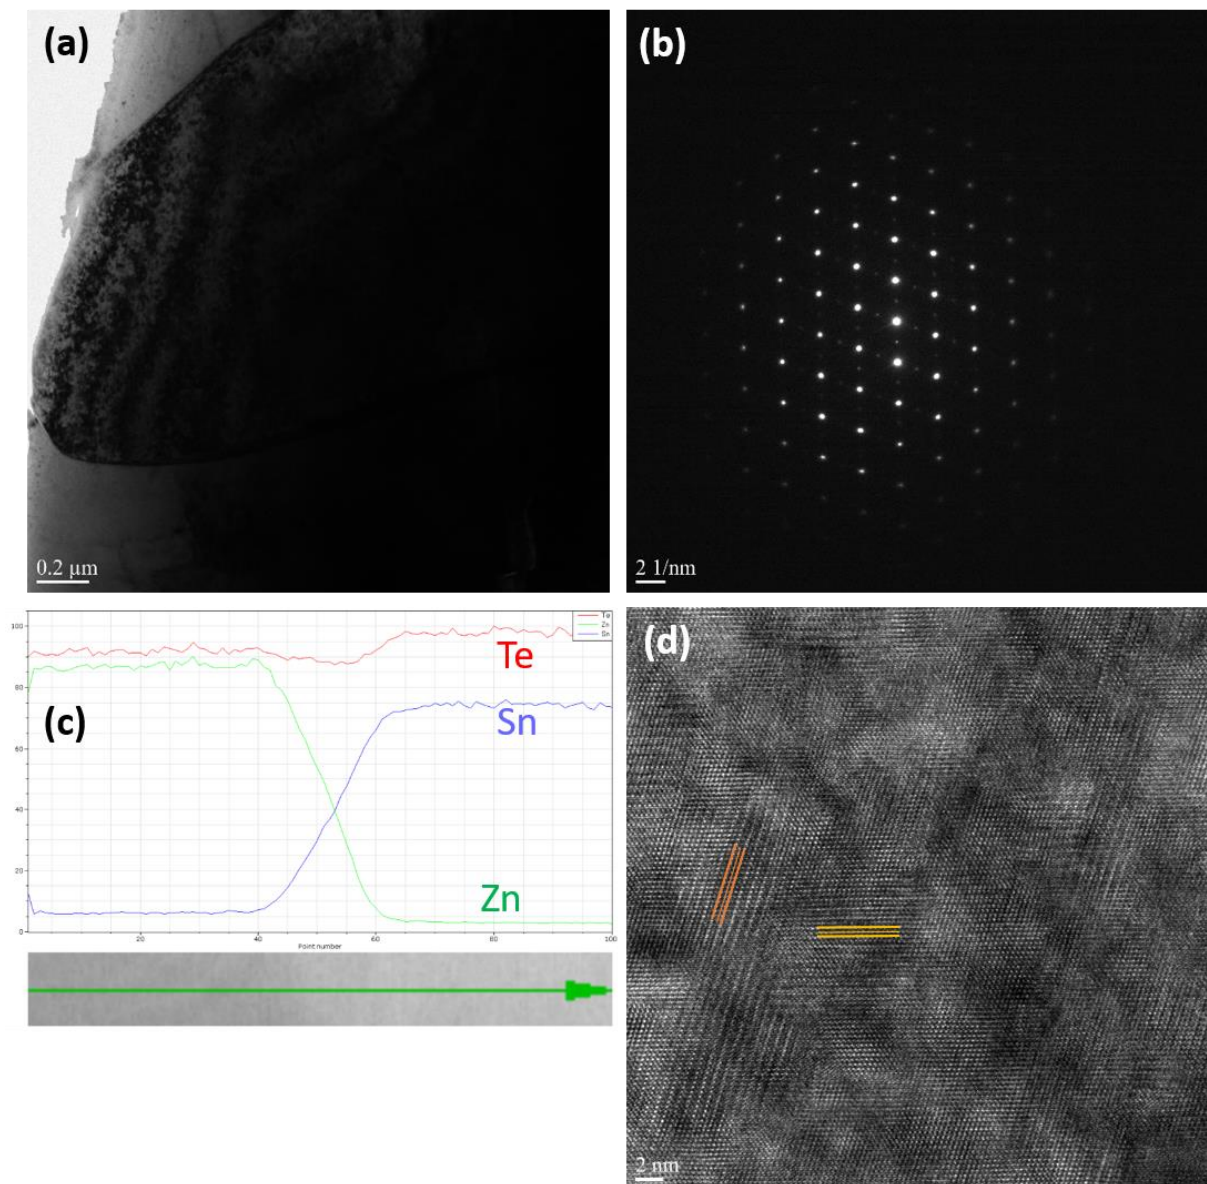

Figure S5. (a) BF image showing numerous nanostructures within a grain, (b) corresponding SAED image showing presence of the CuPt-type ordering, (c) line scan data which confirms presence of alternating SnTe and ZnTe phases within the grain and (d) HRTEM image showing both A and B type variants as represented by the gold and orange lines for the  $\text{Sn}_{0.98}\text{Zn}_{0.02}\text{Te}$  sample.



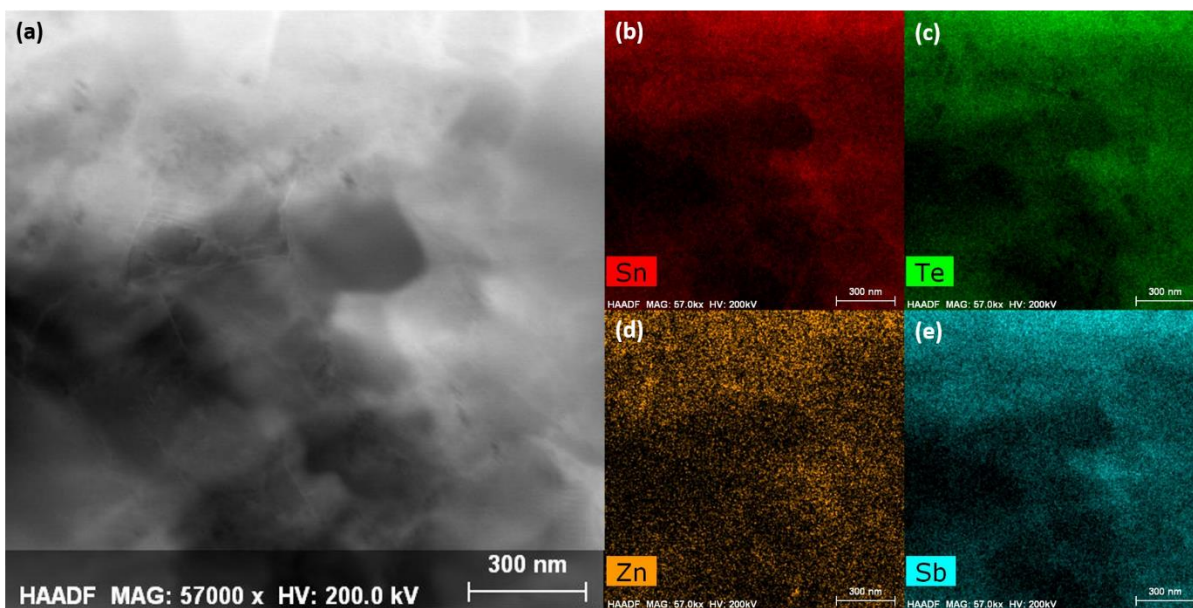

Figure S6. (a) HAADF image and (b-e) corresponding EDS mapping of the elements for the  $\text{Sn}_{0.88}\text{Zn}_{0.02}\text{Sb}_{0.1}\text{Te}$  sample.

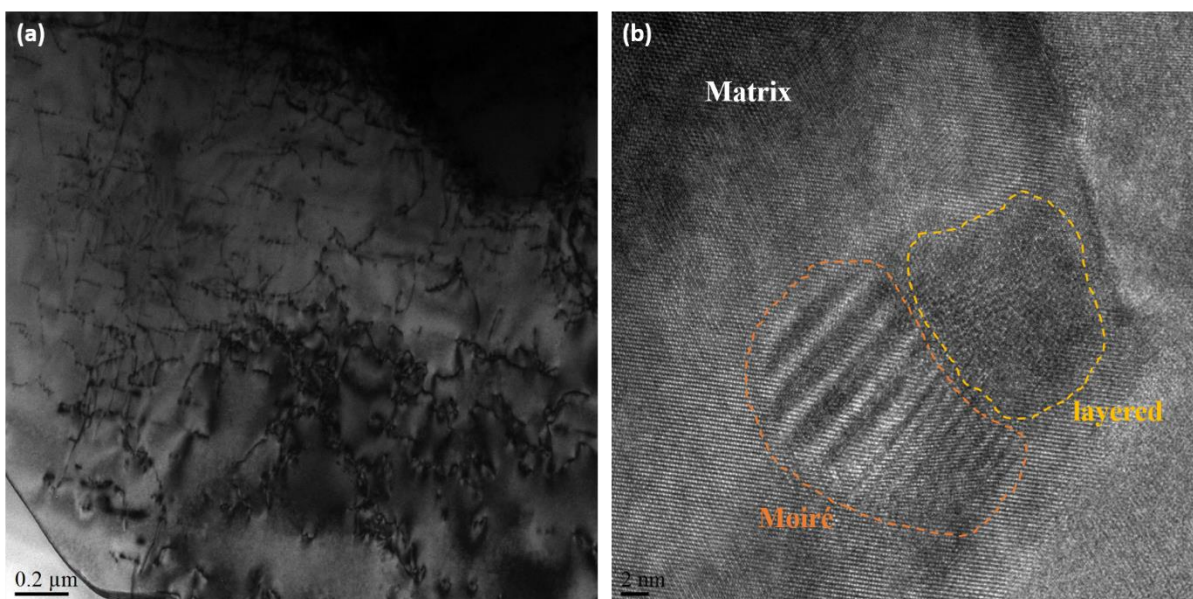

Figure S7. (a) BF image showing dislocation and numerous nanostructures and (b) HRTEM image showing occurrence of Moiré fringes for the  $\text{Sn}_{0.88}\text{Zn}_{0.02}\text{Sb}_{0.1}\text{Te}$  sample.

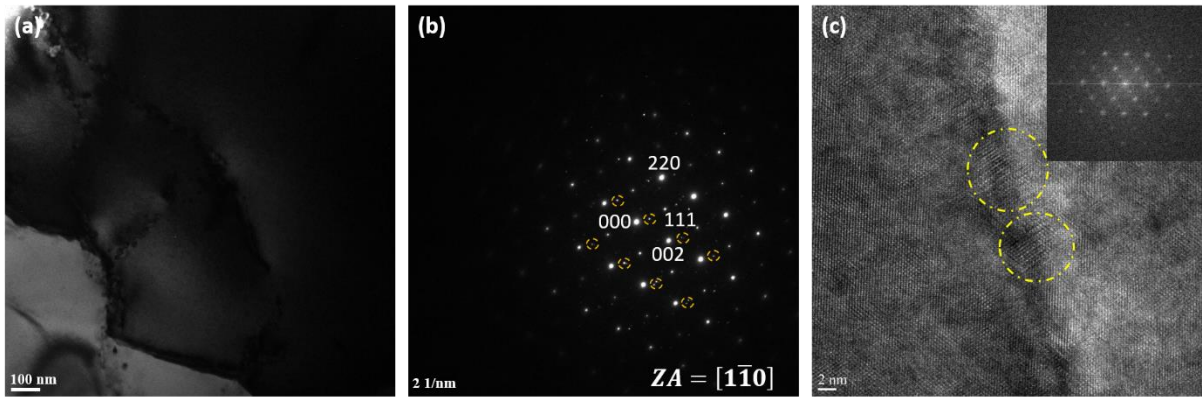

Figure S8. (a) BF image, (b) SAED pattern and (c) HRTEM image for the  $\text{Sn}_{0.83}\text{Zn}_{0.02}\text{Sb}_{0.15}\text{Te}$  sample.

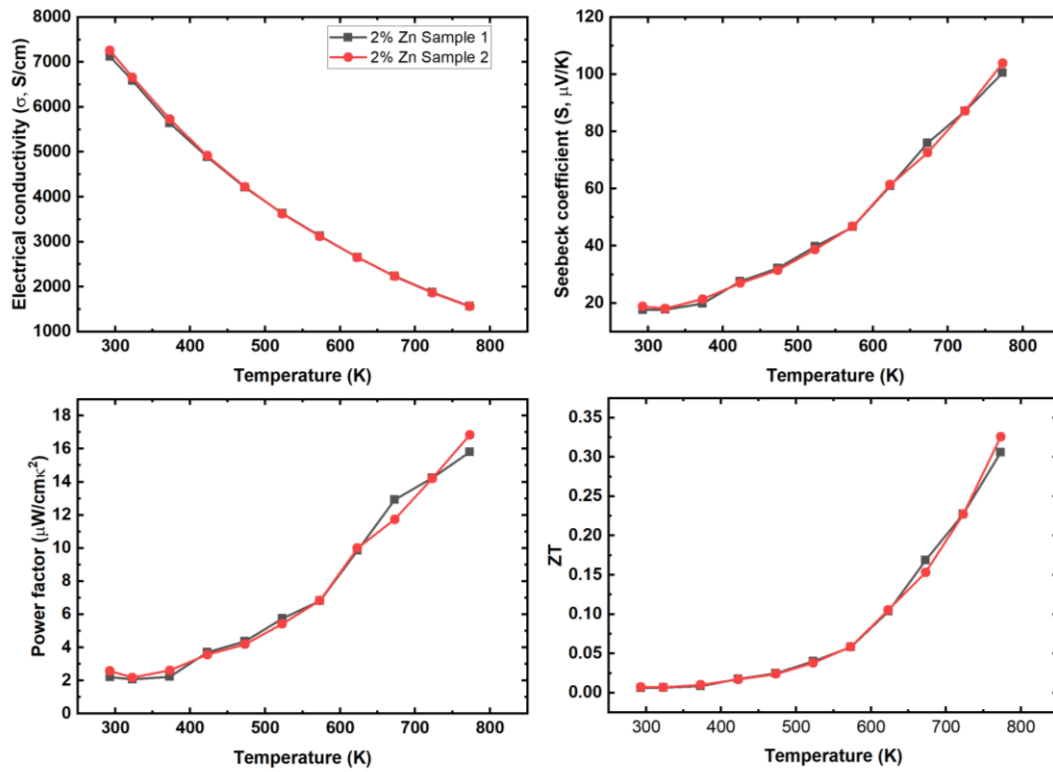

Figure S9. Temperature dependent (a) electrical conductivity, (b) Seebeck coefficient, (c) power factor and ZT for  $\text{Sn}_{0.98}\text{Zn}_{0.02}\text{Te}$  the sample.
